# Supplementary material for: New Inhibitory Effects of Cilnidipine on Microglial P2X7 Receptors and IL-1β Release: An Involvement in its Alleviating Effect on Neuropathic Pain
Source: PubMed Central journal article supplement (PMC7922706; doi:10.3390/cells10020434), 2021-02-18
Supplement: cells-10-00434-s001.pdf [file cells-10-00434-s001.pdf]

| <b>Compound name</b>                    | <b>% of control</b> |
|-----------------------------------------|---------------------|
| Cilnidipine                             | 27.6%               |
| Felodipine                              | >75%                |
| Lomerizine                              | >85%                |
| Mebeverine hydrochloride                | >85%                |
| Nicardipine hydrochloride               | >85%                |
| Niguldipine                             | >85%                |
| Thioridazine hydrochloride              | >85%                |
| Amlodipine                              | >95%                |
| Benidipine HCl                          | >95%                |
| Calycanthine                            | >95%                |
| Diltiazem hydrochloride                 | >95%                |
| Dotarizine                              | >95%                |
| Flunarizine dihydrochloride             | >95%                |
| Lacidipine                              | >95%                |
| Lercanidipine hydrochloride hemihydrate | >95%                |
| Loperamide hydrochloride                | >95%                |
| Manidipine                              | >95%                |
| Mibefradil dihydrochloride              | >95%                |
| Nifedipine                              | >95%                |
| Nisoldipine                             | >95%                |
| Perhexiline maleate                     | >95%                |
| Tolterodine tartrate                    | >95%                |

**Supplementary Figure 1.** A list of 22 compounds that may block or affect Ca<sup>2+</sup> channels evaluated in chemical screening for rat P2X7R inhibition.
